# Supplementary material
Source: ML conference proceedings conference paper supplement (https://openaccess.thecvf.com/content/WACV2025/html/Nottebaum_LowFormer_Hardware_Efficient_WACV_2025_paper.html)
Supplement: Supplementary file 1 [file Nottebaum_LowFormer_Hardware_Efficient_WACV_2025_supplemental.pdf]

# Supplementary Material

## LowFormer: Hardware Efficient Design for Convolutional Transformer Backbones

Moritz Nottebaum<sup>1</sup>  
 nottebaum.moritz@spes.uniud.it

Matteo Dunnhofer<sup>1</sup>  
 matteo.dunnhofer@uniud.it

Christian Micheloni<sup>1</sup>  
 christian.micheloni@uniud.it  
<sup>1</sup>University of Udine, Italy

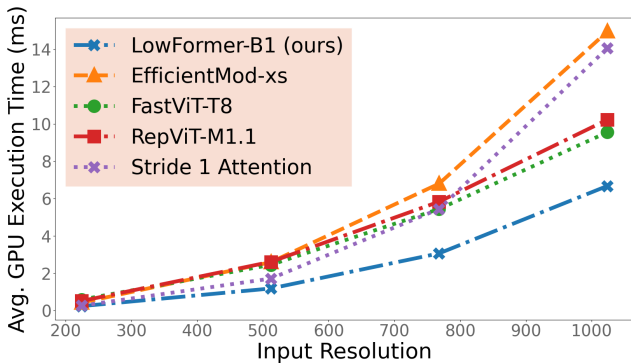

Figure 1. Average execution time for different models, depending on resolutions. The execution time is measured with batch size 200 and 5 warm-up iterations followed by 100 iterations from which the median is taken.

### 1. Latency Evaluation of fused vs unfused MBConv

In Figure 2 we measured relative latency of the fused and unfused MBConv [2]. The fused MBConv retains a lower latency for many configurations of channel dimension and operating resolution (value below 1 in Figure 2), even though its higher amount of MACs (value over 1 in Figure 2). Mainly for channel dimensions higher than 256, latency increases compared to the unfused MBConv. Some entries are missing due to OOM (out of memory) errors.

### 2. Resolution Scaling

In Figure 1 we evaluated execution time of various models with different input resolutions. We used a batch size of 200, the same as for throughput calculation. Even though LowFormer-B1 has a higher or similar top-1 accuracy, it retains a lower average execution time than EfficientMod-xs,

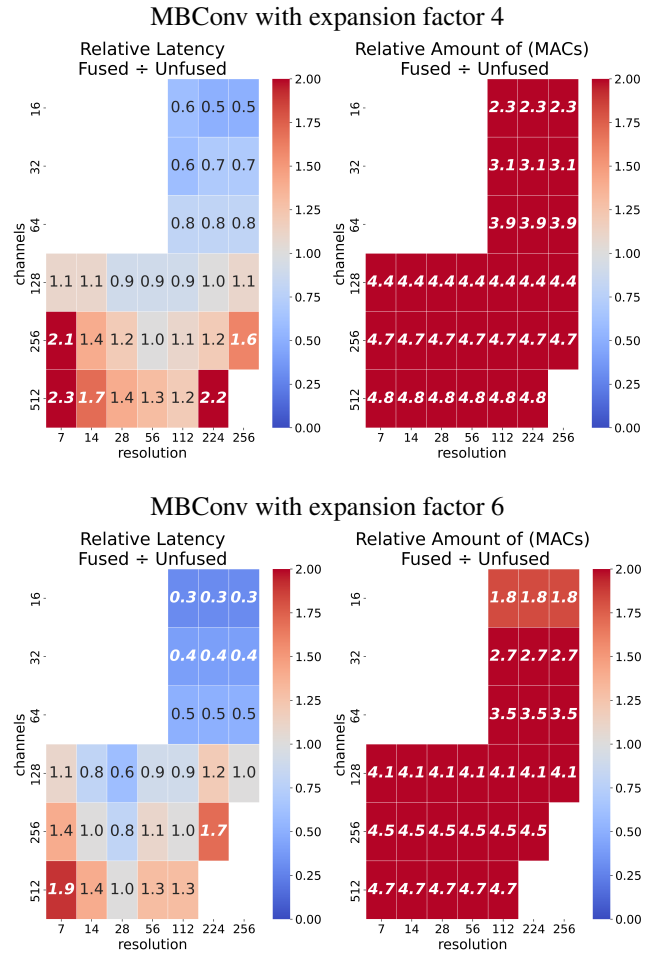

Figure 2. Latency comparison of fused and unfused MBConv. The missing fields resulted in out-of-memory errors.

[1] FastViT-T8 [3], RepViT-M1.1 [4] and the LowFormer-

B1 version without downsampling in the attention block, independent of the input resolution.

## References

- [1] Xu Ma, Xiyang Dai, Jianwei Yang, Bin Xiao, Yinpeng Chen, Yun Fu, and Lu Yuan. Efficient modulation for vision networks. *arXiv preprint arXiv:2403.19963*, 2024. [1](#)
- [2] Mark Sandler, Andrew Howard, Menglong Zhu, Andrey Zhmoginov, and Liang-Chieh Chen. Mobilenetv2: Inverted residuals and linear bottlenecks. In *Proceedings of the IEEE conference on computer vision and pattern recognition*, pages 4510–4520, 2018. [1](#)
- [3] Pavan Kumar Anasosalu Vasu, James Gabriel, Jeff Zhu, Oncel Tuzel, and Anurag Ranjan. Fastvit: A fast hybrid vision transformer using structural reparameterization. In *Proceedings of the IEEE/CVF International Conference on Computer Vision*, pages 5785–5795, 2023. [1](#)
- [4] Ao Wang, Hui Chen, Zijia Lin, Jungong Han, and Guiguang Ding. Repvit: Revisiting mobile cnn from vit perspective. In *Proceedings of the IEEE/CVF Conference on Computer Vision and Pattern Recognition (CVPR)*, pages 15909–15920, June 2024. [1](#)
